# Supplementary material
Source: publisher site journal article supplement (https://www.dovepress.com/article/588931)
Supplement: Supplementary file 1 [file 588931%20Supplementary%20Files.docx]

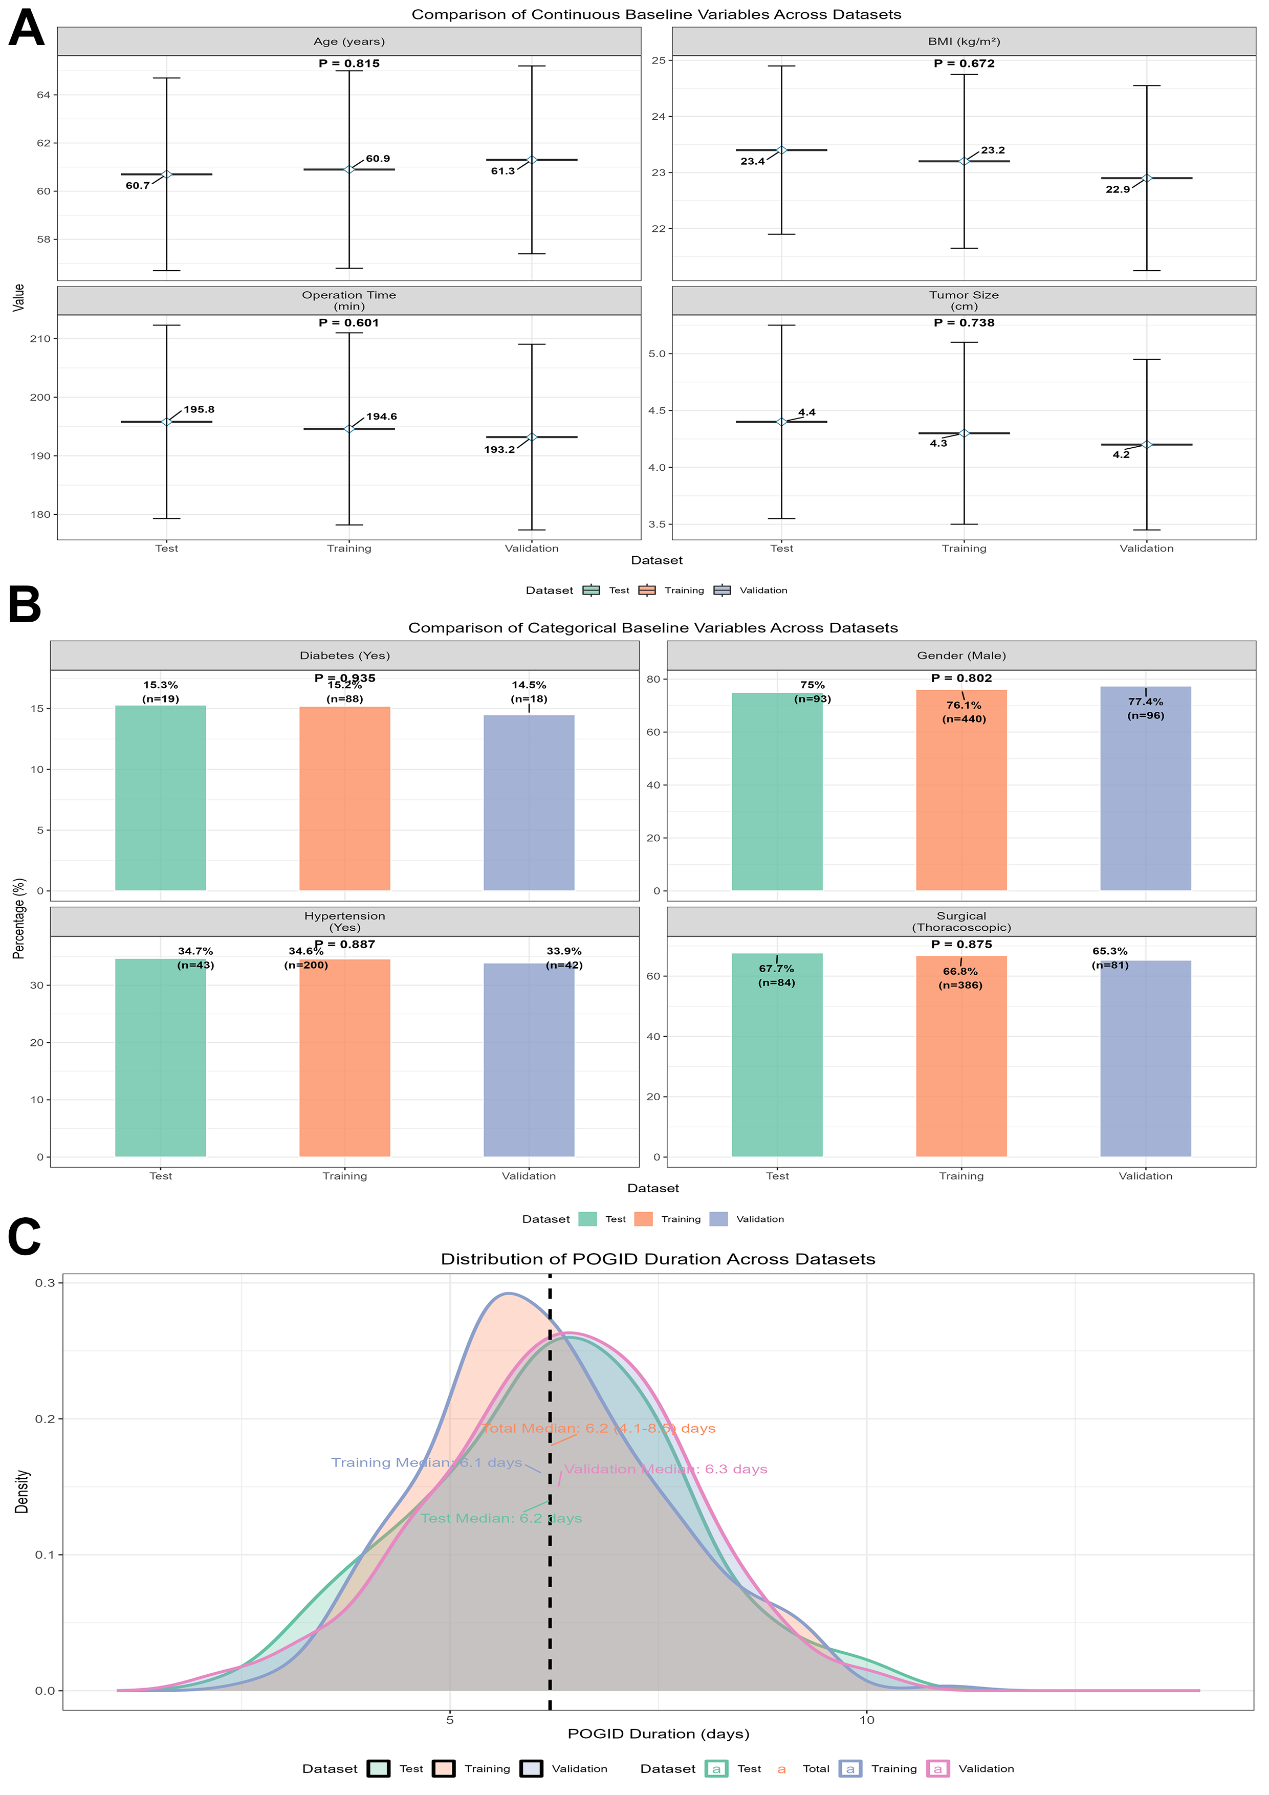


Supplementary figure 1. Baseline Variable Comparisons and POGID Duration Distribution Across Datasets.

Notes.(A) Comparisons of continuous baseline variables (e.g., age, weight) across training, validation, and test datasets; P-values denote inter-dataset difference significance.(B) Proportional distribution of categorical baseline variables (e.g., gender) across datasets; P-values indicate inter-dataset difference significance.(C) Density plot illustrating POGID duration distribution across datasets; the dashed line and annotated text indicate the mean POGID duration for each dataset.

Supplementary table 1. Detailed Univariate Analysis Results and Final Model Inclusion Status of Candidate Indicators

| Indicator_Category | Indicator_Name | Univariate_P_value | Final_Model_Inclusion |
| --- | --- | --- | --- |
| Clinical Baseline | operation duration | 1.00E-04 | Yes |
| Clinical Baseline | neoadjuvant therapy | 0.0475 | Yes |
| Clinical Baseline | TNM stage | 0.0629 | Yes |
| Clinical Baseline | surgical approach | 0.071 | Yes |
| Clinical Baseline | age | 0.0754 | Yes |
| Clinical Baseline | gender | 0.0512 | No |
| Other | indicator_5 | 0.0333 | No |
| Other | indicator_4 | 0.0344 | No |
| Other | indicator_13 | 0.06 | No |
| Other | indicator_8 | 0.0657 | No |
| Routine Blood | T4 ALB | 0.0103 | Yes |
| Routine Blood | T4 Hb | 0.0111 | Yes |
| Routine Blood | T3 WBC | 0.022 | Yes |
| Routine Blood | T4 PLT | 0.0244 | Yes |
| Routine Blood | T3 Hb | 0.0352 | Yes |
| Routine Blood | T4 WBC | 0.038 | Yes |
| Routine Blood | T3 CRP | 0.0418 | Yes |
| Routine Blood | T3 NLR | 0.0435 | Yes |
| Routine Blood | T5 WBC | 0.0613 | Yes |
| Routine Blood | T5 PLT | 0.0668 | Yes |
| Routine Blood | T4 CRP | 0.0788 | Yes |
| Routine Blood | T1 NLR | 0.0094 | No |
| Routine Blood | T2 Hb | 0.0188 | No |
| Routine Blood | T2 WBC | 0.032 | No |
| Routine Blood | T5 CRP | 0.0782 | No |
| Ultrasound | U1 gallbladder volume | 0.0131 | Yes |
| Ultrasound | U3 intestinal peristalsis | 0.0175 | Yes |
| Ultrasound | U2 gallbladder wall thickness | 0.0653 | Yes |
| Ultrasound | U2 intestinal peristalsis | 0.0886 | Yes |
| Ultrasound | U2 gastric antrum area | 0.0893 | Yes |
| Ultrasound | U1 gastric antrum area | 0.0985 | Yes |
| Ultrasound | U1 intestinal peristalsis | 0.0467 | No |

Note: This table provides the full details of the univariate screening results (for indicators with P < 0.1) corresponding to the feature screening process described in the main text. Column definitions:

Indicator Category: Classification of the candidate indicator (e.g., Clinical Baseline, Routine Blood, Ultrasonic Dynamic Features);

Indicator Name: Specific name of the indicator (abbreviations: WBC = White Blood Cell, Hb = Hemoglobin, PLT = Platelet, CRP = C-reactive Protein, ALB = Albumin, NLR = Neutrophil-to-Lymphocyte Ratio);

Univariate_P_value: P-value of the univariate analysis (only indicators with P < 0.1 are included in this table);

Final_Model_Inclusion: Whether the indicator was retained in the final model after LASSO regression analysis ("Yes" = retained; "No" = excluded).
